# Supplementary material for: タイ産食用カタツムリ Hemiplecta distincta (Pfeiffer) の繁殖生態
Source: PeerJ journal article supplement (doi:10.7717/peerj.13512), 1987-04-30

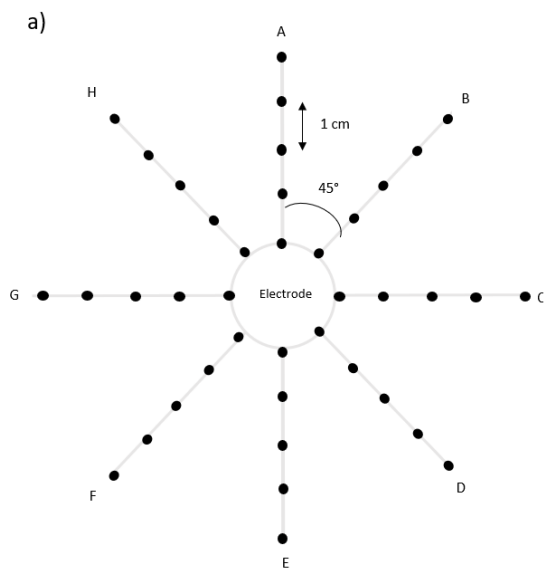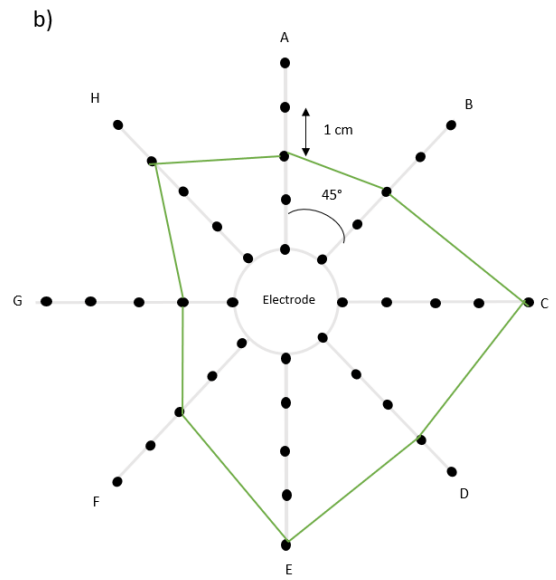

Supplement: Supplementary_file_4_Eight-radial-lines_approach.pdf [file Supplementary_file_4_Eight-radial-lines_approach.pdf]
